# Supplementary material for: Physiological Effects of 2-Bromoethanesulfonate on Hydrogenotrophic Pure and Mixed Cultures
Source: MDPI journal article supplement (doi:10.3390/microorganisms10020355), 2022-02-03
Supplement: s1 [file s1]

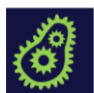

# Physiological effects of 2-bromoethanesulfonate on hydrogenotrophic pure and mixed cultures

Washington Logroño, Marcell Nikolausz, Hauke Harms and Sabine Kleinsteuber\*

Department of Environmental Microbiology, Helmholtz Centre for Environmental Research – UFZ, 04318 Leipzig, Germany; [washington.logrono@ufz.de](mailto:washington.logrono@ufz.de) (W.L.); [marcell.nikolausz@ufz.de](mailto:marcell.nikolausz@ufz.de) (M.N.); [hauke.harms@ufz.de](mailto:hauke.harms@ufz.de) (H.H.)

\*Correspondence: [sabine.kleinsteuber@ufz.de](mailto:sabine.kleinsteuber@ufz.de) (S.K.)

## Supplementary materials

**Table S1.** Composition of the medium component 1 for media A, A1 and A2

**Table S2.** Stock solutions used to supplement media A, A1 and A2

**Table S3.** Composition of the stock solutions for media A, A1 and A2

**Table S4.** Composition of medium B

**Table S5.** Composition of the medium component 1 for medium C

**Table S6.** Stock solutions used to supplement medium C

**Table S7.** Composition of the vitamin solution for medium C

**Table S1.** Composition of the medium component 1 for media A, A1 and A2. The anoxic and sterile component 1 was supplemented with stock solutions (**Table S2**) according to the requirements of media A, A1 or A2. Composition of the stock solutions is provided in **Table S3**.

| Compound                                  | Final concentration (g L <sup>-1</sup> ) |           |           |
|-------------------------------------------|------------------------------------------|-----------|-----------|
|                                           | Medium A                                 | Medium A1 | Medium A2 |
| NH <sub>4</sub> Cl                        | 0.5                                      | 0.5       | 0.5       |
| KH <sub>2</sub> PO <sub>4</sub>           | 0.2                                      | 0.2       | 0.2       |
| MgCl <sub>2</sub> × 6 H <sub>2</sub> O    | 0.1                                      | 0.1       | 0.1       |
| KCl                                       | 0.2                                      | 0.2       | 0.2       |
| NaCl                                      | 2.0                                      | 2.0       | 2.0       |
| Yeast extract                             | 0.2                                      | -         | -         |
| Resazurin                                 | 0.0005                                   | 0.0005    | 0.0005    |
| Trace elements SL10 (mL L <sup>-1</sup> ) | 1                                        | 1         | 1         |

Note: Component 1 (850 mL) was made anoxic by stirring in the anaerobic chamber (97% N<sub>2</sub>, 3% H<sub>2</sub>) for 45 min. Sterilization was done by autoclaving at 121°C for 20 min.

**Table S2.** Stock solutions used to supplement media A, A1 and A2

| Stock solutions                                            | Volume added (mL L <sup>-1</sup> ) |           |           |
|------------------------------------------------------------|------------------------------------|-----------|-----------|
|                                                            | Medium A                           | Medium A1 | Medium A2 |
| Selenite-tungstate solution<br>DSMZ 385 (1:4 diluted)      | 4                                  | 4         | 4         |
| Na <sub>2</sub> CO <sub>3</sub> (29.41 g L <sup>-1</sup> ) | 34                                 | 34        | 34        |
| NaHCO <sub>3</sub> (76.00 g L <sup>-1</sup> )              | 100                                | 100       | 100       |
| Cysteine-HCl (30.00 g L <sup>-1</sup> )                    | 12                                 | 12        | 12        |
| Vitamin solution                                           | -                                  | 1         | -         |

Note: Every stock solution was made anoxic by stirring in the anaerobic chamber for 30 min.

**Table S3.** Composition of the stock solutions for media A, A1, and A2

| Component                                             | Concentration (mg L <sup>-1</sup> ) |
|-------------------------------------------------------|-------------------------------------|
| Trace elements SL10 (DSMZ medium 320)                 |                                     |
| FeCl <sub>2</sub> × 4 H <sub>2</sub> O                | 1500                                |
| ZnCl <sub>2</sub>                                     | 70                                  |
| MnCl <sub>2</sub> × 4 H <sub>2</sub> O                | 100                                 |
| H <sub>3</sub> BO <sub>3</sub>                        | 6                                   |
| CoCl <sub>2</sub> × 6 H <sub>2</sub> O                | 190                                 |
| CuCl <sub>2</sub> × 2 H <sub>2</sub> O                | 2                                   |
| NiCl <sub>2</sub> × 6 H <sub>2</sub> O                | 24                                  |
| Na <sub>2</sub> MoO <sub>4</sub> × 2 H <sub>2</sub> O | 36                                  |
| Selenite-tungstate solution (DSMZ medium 385)         |                                     |
| NaOH                                                  | 500                                 |
| Na <sub>2</sub> SeO <sub>3</sub> × 5 H <sub>2</sub> O | 3.0                                 |
| Na <sub>2</sub> WO <sub>4</sub> × 2 H <sub>2</sub> O  | 4.0                                 |
| Vitamin solution [1]                                  |                                     |
| Biotin                                                | 20                                  |
| Folic acid                                            | 20                                  |
| Pyridoxine                                            | 100                                 |
| Thiamine                                              | 50                                  |
| Riboflavin                                            | 50                                  |
| Nicotinic acid                                        | 50                                  |
| Calcium pantothenate                                  | 50                                  |
| Vitamin B12                                           | 20                                  |
| <i>p</i> -Aminobenzoate                               | 80                                  |
| Lipoic acid                                           | 50                                  |

Note: For preparing SL10, FeCl<sub>2</sub> was first dissolved in HCl (25%, 10 mL L<sup>-1</sup>) and then diluted in water. Subsequently, other salts were added and dissolved.

**Table S4.** Composition of medium B [2]

| Stock A                                                                              | Concentration (g L <sup>-1</sup> ) |
|--------------------------------------------------------------------------------------|------------------------------------|
| NH <sub>4</sub> Cl                                                                   | 100                                |
| NaCl                                                                                 | 10                                 |
| MgCl <sub>2</sub> × 6 H <sub>2</sub> O                                               | 10                                 |
| CaCl <sub>2</sub> × 2 H <sub>2</sub> O                                               | 5                                  |
| <b>Stock B</b>                                                                       |                                    |
| KH <sub>2</sub> PO <sub>4</sub> 3 H <sub>2</sub> O                                   | 200                                |
| <b>Stock C</b>                                                                       |                                    |
| Resazurin                                                                            | 0.5                                |
| <b>Stock D (Trace-metal and selenite solution)</b>                                   |                                    |
| FeCl <sub>2</sub> × 4 H <sub>2</sub> O                                               | 2                                  |
| H <sub>3</sub> BO <sub>3</sub>                                                       | 0.05                               |
| ZnCl <sub>2</sub>                                                                    | 0.05                               |
| CuCl <sub>2</sub> × 2 H <sub>2</sub> O                                               | 0.038                              |
| MnCl <sub>2</sub> × 4 H <sub>2</sub> O                                               | 0.05                               |
| (NH <sub>4</sub> ) <sub>6</sub> Mo <sub>7</sub> O <sub>24</sub> × 4 H <sub>2</sub> O | 0.05                               |
| AlCl <sub>3</sub>                                                                    | 0.05                               |
| CoCl <sub>2</sub> 6 × H <sub>2</sub> O                                               | 0.05                               |

|                                                       |                                          |
|-------------------------------------------------------|------------------------------------------|
| NiCl <sub>2</sub> 6 × H <sub>2</sub> O                | 0.092                                    |
| Ethylenediaminetetraacetate                           | 0.5                                      |
| Concentrated HCl (mL)                                 | 1                                        |
| Na <sub>2</sub> SeO <sub>3</sub> × 5 H <sub>2</sub> O | 0.1                                      |
| <b>Stock E (Vitamins)</b>                             | <b>Concentration (mg L<sup>-1</sup>)</b> |
| Biotin                                                | 2                                        |
| Folic acid                                            | 2                                        |
| Pyridoxine acid                                       | 10                                       |
| Riboflavin                                            | 5                                        |
| Thiamine hydrochloride                                | 5                                        |
| Vitamin B12                                           | 0.1                                      |
| Nicotinic acid                                        | 5                                        |
| Calcium pantothenate                                  | 5                                        |
| <i>p</i> -Aminobenzoate                               | 5                                        |
| Lipoic acid                                           | 5                                        |

Note: The stock solutions were added to 975 mL distilled water in the following volumes: (A), 10 mL; (B), 2 mL; (C), 1 mL; (D), 1 mL and (E), 1 mL. The mixture was gassed with N<sub>2</sub>/CO<sub>2</sub> (80-20%) mixture to maintain a neutral pH. Cysteine hydrochloride, 0.5 g and NaHCO<sub>3</sub>, 2.6 g dissolved in 10 mL distilled water were added. The medium was then dispensed to serum bottles. The medium was supplemented with Na<sub>2</sub>S × 9H<sub>2</sub>O to a final concentration of 0.025% before inoculation.

**Table S5.** Composition of the medium component 1 for medium C [3]. The anoxic and sterile component 1 was supplemented with stock solutions as indicated in **Table S6**.

| Compound                                                            | Final concentration (g L <sup>-1</sup> ) |
|---------------------------------------------------------------------|------------------------------------------|
| KCl                                                                 | 0.34                                     |
| MgCl <sub>2</sub> × 6 H <sub>2</sub> O                              | 4.00                                     |
| NH <sub>4</sub> Cl                                                  | 0.25                                     |
| CaCl <sub>2</sub> × 2 H <sub>2</sub> O                              | 0.14                                     |
| Na-K PO <sub>4</sub> (mL L <sup>-1</sup> )                          | 1                                        |
| NaCl                                                                | 18                                       |
| Trace elements SL10 (DSMZ medium 320) (mL L <sup>-1</sup> )         | 1                                        |
| Selenite-tungstate solution (DSMZ medium 385) (mL L <sup>-1</sup> ) | 1                                        |

Note: Component 1 (960 mL) was made anoxic by stirring in the anaerobic chamber (97% N<sub>2</sub>, 3% H<sub>2</sub>) for 45 min. Sterilization was done by autoclaving at 121°C for 20 min. The composition of SL10 and selenite-tungstate solution is provided in **Table S3**.

**Table S6.** Stock solutions used to supplement medium C. The composition of the vitamin solution is provided in **Table S7**.

| Stock solutions                                                                                         | Volume added (mL L <sup>-1</sup> ) |
|---------------------------------------------------------------------------------------------------------|------------------------------------|
| MgSO <sub>4</sub> × 7 H <sub>2</sub> O (3.45 g / 100 mL)                                                | 10                                 |
| Fe(NH <sub>4</sub> ) <sub>2</sub> (SO <sub>4</sub> ) <sub>2</sub> × 6 H <sub>2</sub> O (20 mg / 100 mL) |                                    |
| NaHCO <sub>3</sub> (30 mM)                                                                              | 30                                 |
| Na <sub>2</sub> HPO <sub>4</sub> (75 μM)                                                                | 1                                  |
| KH <sub>2</sub> PO <sub>4</sub> (75 μM)                                                                 |                                    |
| Vitamin solution (DSMZ media 141 and 384)                                                               | 1                                  |

**Table S7.** Composition of the vitamin solution for medium C (DSMZ media 141 und 384)

| Component               | Concentration (mg L <sup>-1</sup> ) |
|-------------------------|-------------------------------------|
| Biotin                  | 2                                   |
| Folic acid              | 2                                   |
| Pyridoxine - HCl        | 10                                  |
| Thiamine - HCl          | 5                                   |
| Riboflavin              | 5                                   |
| Nicotinic acid          | 5                                   |
| Calcium pantothenate    | 5                                   |
| Vitamin B12             | 0.1                                 |
| <i>p</i> -Aminobenzoate | 5                                   |
| Lipoic acid             | 5                                   |

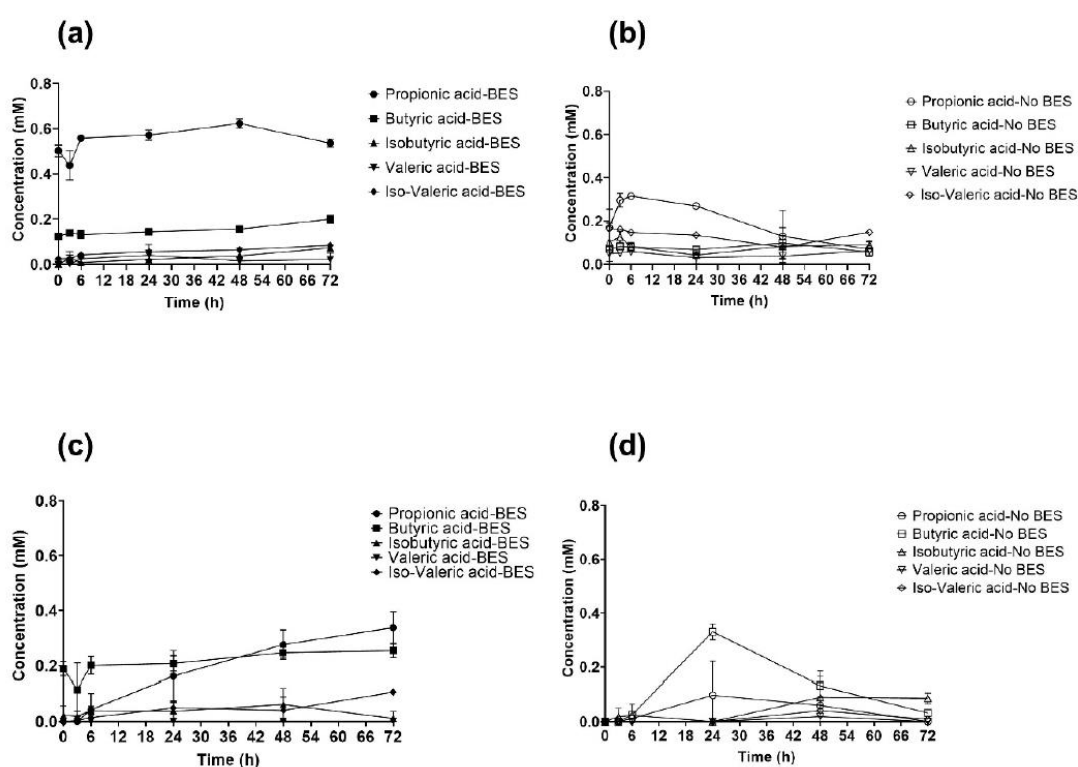

**Figure S1.** Concentrations of longer-chain carboxylates in the anaerobic granules culture in medium A and B. BES-inhibited culture in medium A (a), non-inhibited culture in medium A (b), BES-inhibited culture in medium B (c), non-inhibited culture in medium B (d). The bottles were pressurized with H<sub>2</sub> (80%) and CO<sub>2</sub> at ~2.2 bar during one batch cycle. All experiments were conducted in 200-mL serum bottles with 50 mL working volume. The error bars depict the standard deviation of the mean of n = 3 for non-inhibited cultures and n = 5 for inhibited cultures. When not visible the error bars are smaller than the symbol. Filled symbols: BES added, open symbols: BES-free.

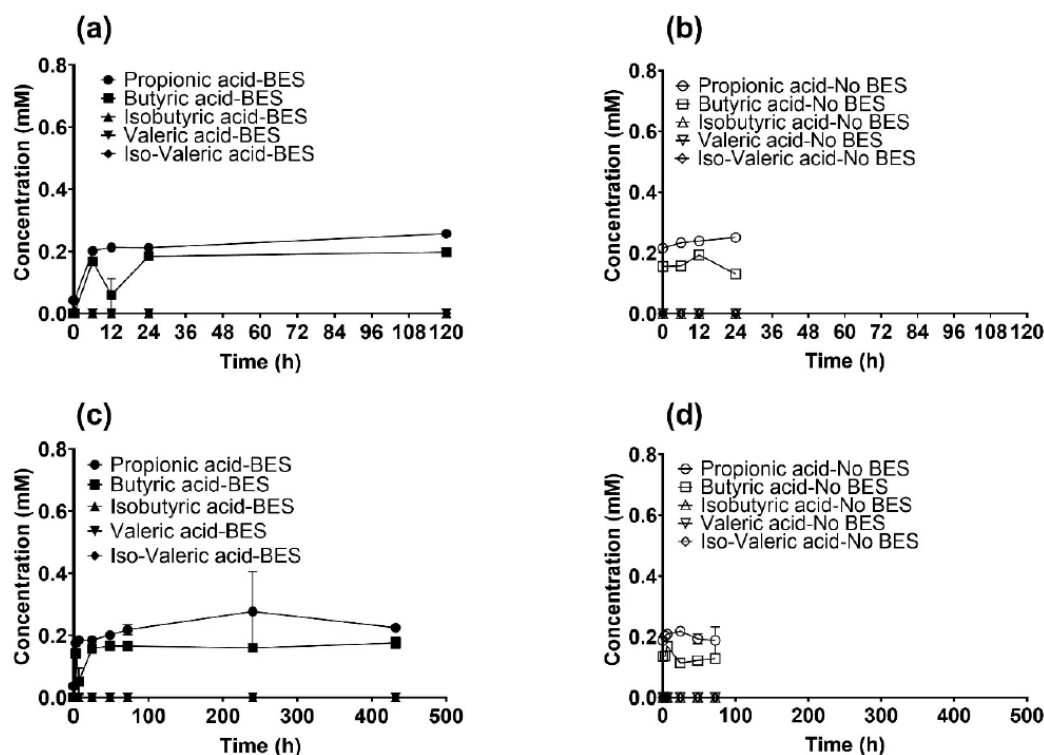

**Figure S2.** Concentrations of longer-chain carboxylates in the hydrogenotrophic enrichment culture in medium A and A1. BES-inhibited culture in medium A (a), non-inhibited culture in medium A (b), BES-inhibited culture in medium A1 (c), non-inhibited culture in medium A1 (d). Experimental conditions were as specified in Figure S1. The error bars show the standard deviation of the mean of  $n = 3$  and  $n = 4$  for cultures in medium A and A1, respectively. When not visible the error bars are smaller than the symbol. Filled symbols: BES added, open symbols: BES-free.

## References

1. Bonk, F.; Popp, D.; Weinrich, S.; Sträuber, H.; Becker, D.; Kleinstaub, S.; Harms, H.; Centler, F. Determination of Microbial Maintenance in Acetogenesis and Methanogenesis by Experimental and Modeling Techniques. *Frontiers in Microbiology* **2019**, *10*, 1–13, doi:10.3389/fmicb.2019.00166.
2. Omar, B.; Abou-shanab, R.; El-gammal, M.; Fotidis, I.A.; Kougias, P.G.; Zhang, Y.; Angelidaki, I. Simultaneous Biogas Upgrading and Biochemicals Production Using Anaerobic Bacterial Mixed Cultures. *Water Research* **2018**, *142*, 86–95, doi:10.1016/j.watres.2018.05.049.
3. Deutzmann, J.S.; Spormann, A.M. Enhanced Microbial Electrosynthesis by Using Defined Co-Cultures. *ISME Journal* **2017**, *11*, 704–714, doi:10.1038/ismej.2016.149.
